# Supplementary material
Source: PubMed Central journal article supplement (PMC3533296)
Supplement: JCI64941sd.pdf [file JCI64941sd.pdf]

## Supplemental data

### Direct control of hepatic glucose production by interleukin-13

Kristopher J. Stanya<sup>1</sup>, David Jacobi<sup>1,2</sup>, Sihao Liu<sup>1,\*</sup>, Perna Bhargava<sup>1,\*</sup>, Lingling Dai<sup>1,3</sup>, Matthew R. Gangl<sup>1</sup>, Karen Inouye<sup>1</sup>, Jillian Barlow<sup>4</sup>, Yewei Ji<sup>5</sup>, Joseph P. Mizgerd<sup>6</sup>, Ling Qi<sup>5</sup>, Hang Shi<sup>7</sup>, Andrew N.J. McKenzie<sup>4</sup> and Chih-Hao Lee<sup>1,†</sup>.

<sup>1</sup>Department of Genetics and Complex Diseases, Division of Biological Sciences, Harvard School of Public Health, 665 Huntington Ave, Boston, MA 02115, USA

<sup>2</sup>CHRU de Tours, Service de Médecine Interne-Nutrition, INSERM U 1069, Université François Rabelais, Tours, France

<sup>3</sup>Pharmacogenetics Research Institute, Institute of Clinical Pharmacology, Central South University, Changsha, Hunan, People's Republic of China

<sup>4</sup>MRC Laboratory of Molecular Biology, Cambridge CB2 0QH, UK

<sup>5</sup>Division of Nutritional Science, Cornell University, Ithaca, NY 14853, USA

<sup>6</sup>Pulmonary Center, Boston University School of Medicine, Boston MA 02118, USA

<sup>7</sup>Department of Internal Medicine, Wake Forest Health Sciences, Winston-Salem, NC 27157, USA

\*These authors contributed equally to this work

†Correspondence should be addressed:

C.-H. L. e-mail: clee@hsph.harvard.edu

## Supplemental Methods

*Lipogenic and fat oxidation assays.* For measurement of lipogenesis, hepatocytes were treated  $\pm$  10 ng/ml rIL-13 overnight followed by incubation with  $^{14}\text{C}$ -acetate for 6 h.  $^{14}\text{C}$ -lipids were extracted with 2:1 chloroform:methanol and normalized to protein content. Fatty acid oxidation assays were conducted using the  $^3\text{H}$  palmitate tracer, following overnight rIL-13 treatment.  $^3\text{H}_2\text{O}$  was determined and normalized to the protein concentration.

*FACS and F4/80<sup>+</sup> cell isolation.* Livers and WAT were harvested from mice fasted for 6 h. Liver cells were released by extensive pipetting and filtered through a cell strainer (70  $\mu\text{m}$ ), followed by centrifugation at 50g to pellet hepatocytes. Supernatant containing immune cells was washed and collected. WAT was digested for 30 min at 37°C with 2 mg/mL collagenase, filtered through nylon mesh (250  $\mu\text{m}$ ) and centrifuged to pellet the stromal vascular fraction. Cells devoid of hepatocytes or adipocytes were subjected to either FACS using antibodies against F4/80 (Life Technologies) and Mgl1 (AbD Serotec) or magnetic beads conjugated with anti-F4/80 antibody (Life Technologies) for RNA isolation to determine M1/M2 gene expression in resident macrophages.

### Supplemental table 1

Metabolic parameters of high fat fed BALB/c mice

| BALB/c HFD               | wt          | <i>Il-13</i> <sup>-/-</sup> |
|--------------------------|-------------|-----------------------------|
| Weight (g)               | 42.78±1.82  | 43.66±1.31                  |
| Liver/body weight (mg/g) | 33.44±1.2   | 34.13±1.27                  |
| WAT/body weight (mg/g)   | 32.7±1.5    | 33.32±3.12                  |
| Glucose (mg/dL)          | 99.20±9.40  | 141.20±12.16*               |
| Insulin (ng/mL)          | 0.47±0.009  | 0.45±0.004                  |
| Triglyceride (mg/dL)     | 49.53±4.37  | 67.59±5.43*                 |
| Cholesterol (mg/dL)      | 111.19±5.00 | 125.64±5.57                 |
| Free fatty acid (mMol)   | 2.05±0.12   | 1.71±0.14                   |
| Lactate (mg/dL)          | 15.49±1.16  | 14.42±1.15                  |

Mice were fasted 6 h ( $n = 8$ /genotype). \* $p < 0.05$ , wt vs. *Il-13*<sup>-/-</sup> mice

## Supplementary figures and figure legends

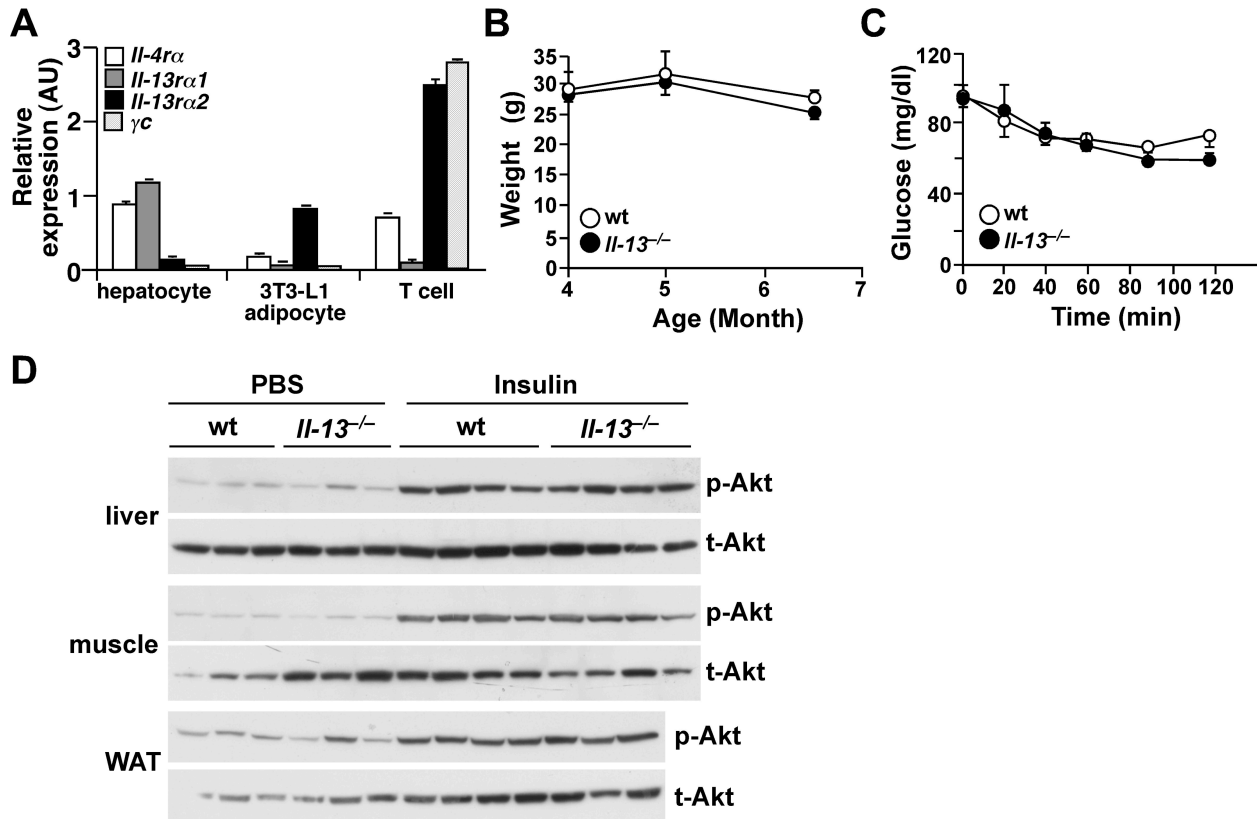

### Supplemental Figure 1

Body weight and insulin responses in chow-fed and insulin signaling in high fat fed *Il-13*<sup>-/-</sup> mice in the BALB/c background. (A) The expression of Il-13 receptors in immune and non-immune cells determined by real-time PCR. Il-13 (and Il-4) binds to type II receptors consisting of Il-4 $\alpha$ /Il-13 $\alpha$ 1 dimers. Il-13 $\alpha$ 2 is thought to be a decoy receptor. Il-4 also binds to type I receptors consisting of Il-4 $\alpha$ / $\gamma$ c dimers, which are only expressed in immune cells, such as T lymphocytes. (B) Body weight and (C) insulin tolerance test (ITT) in wild-type (wt) or *Il-13*<sup>-/-</sup> mice in the BALB/c background on a normal chow diet (9% fat). ITT was conducted in 6 month old animals ( $n = 5$ /genotype). (D) Immunoblotting of tissue insulin signaling in high fat fed wt and *Il-13*<sup>-/-</sup> mice in the BALB/c background assessed by insulin stimulated Akt phosphorylation ( $n = 8$ /genotype). 5u/kg insulin was i.p. injected and tissues were collected 10 min later. Data are presented as mean  $\pm$  SEM.

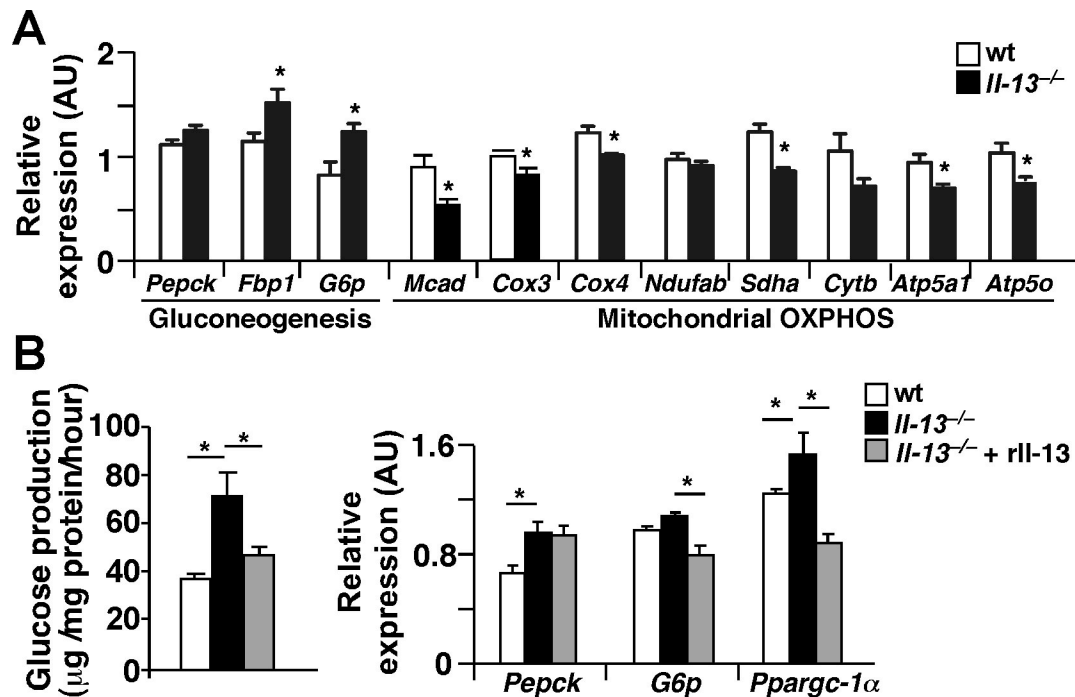

### Supplemental Figure 2

Increased hepatic gluconeogenic gene expression in BALB/c *Il-13*<sup>-/-</sup> mice on high fat diet. (A) Metabolic gene expression in the liver. Liver samples from 6 h fasted wt and *Il-13*<sup>-/-</sup> mice in the BALB/c background (n=6, high fat diet for 6 months) were collected and gene expression was analyzed by quantitative, real-time PCR. (B) Glucose production and gluconeogenic gene expression are elevated in primary hepatocytes derived from *Il-13*<sup>-/-</sup> mice (BALB/c on high fat diet). rIl-13 (10 ng/ml) was given to hepatocytes for two hours followed by a 4 hour glucose production assay in the presence of rIl-13. Data are presented as mean  $\pm$  SEM; \*p < 0.05.

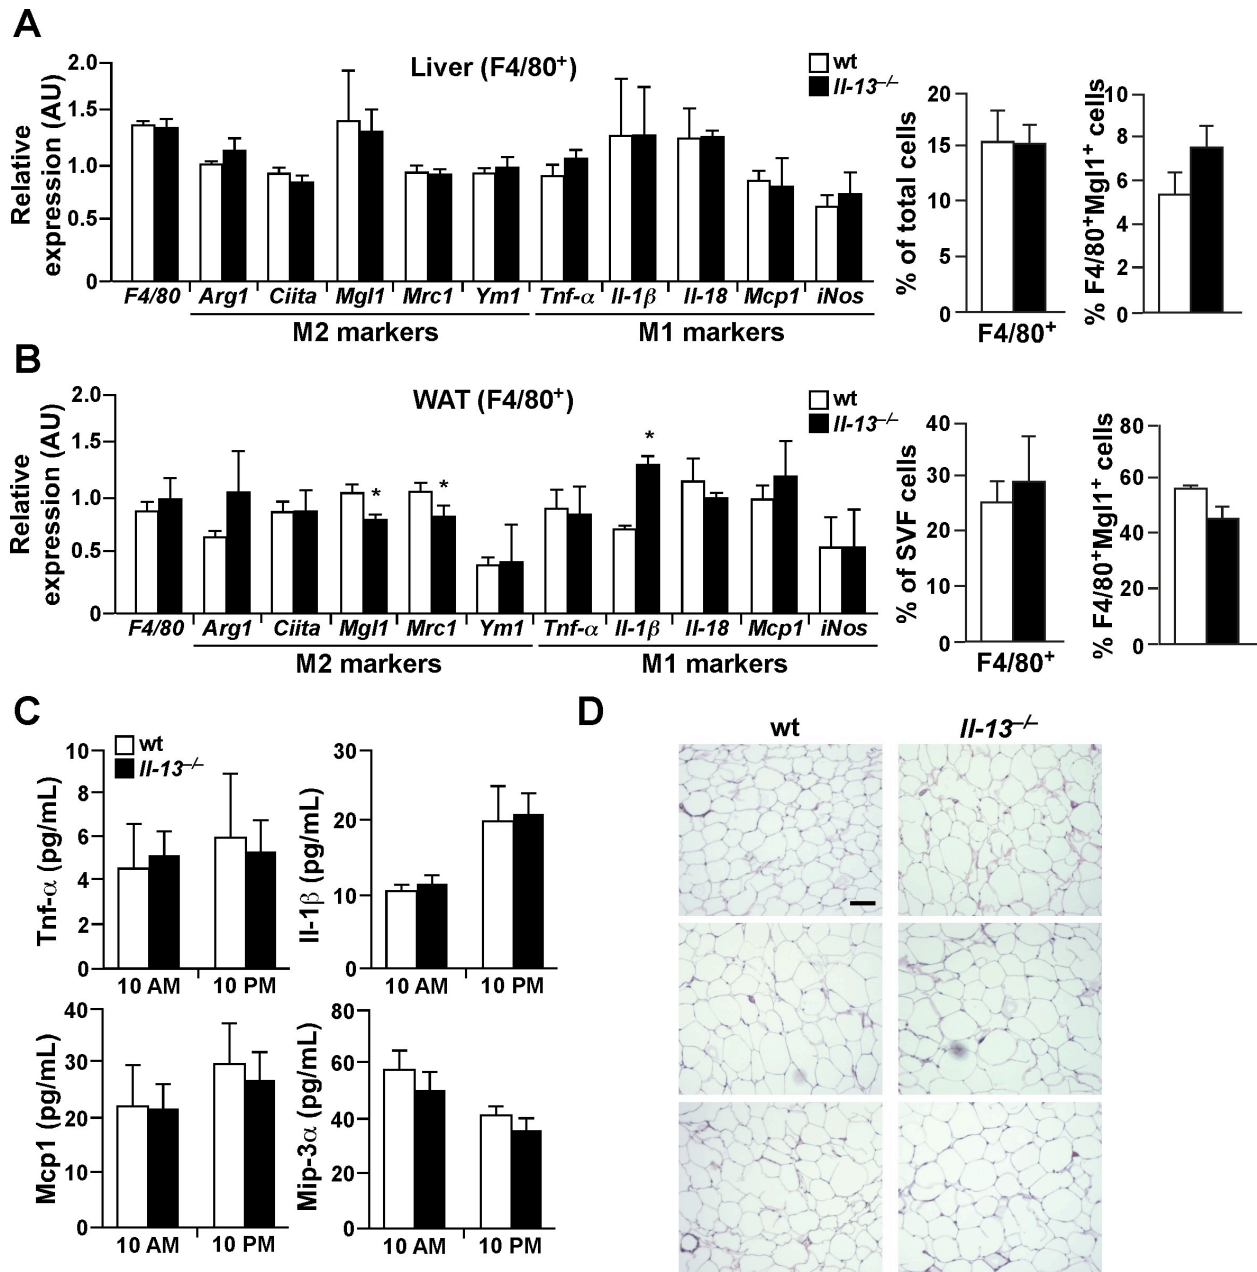

### Supplemental Figure 3

Assessment of macrophage activation and tissue inflammation in C57BL/6 wt and *Il-13*<sup>-/-</sup> mice on normal chow (7 month old males). (A) and (B) Gene expression analyses of inflammatory markers in F4/80<sup>+</sup> cells isolated from livers and white adipose tissues (WAT) ( $n = 4$ ). Cells were isolated using magnetic beads conjugated with anti-F4/80 antibody. Right panel: FACS analyses to examine the percentage of F4/80<sup>+</sup> cells in the non-hepatocyte or non-adipocyte fraction and the expression of Mgl1 in F4/80<sup>+</sup> cells. (C) Circulating concentrations of cytokines and chemokines determined by ELISA ( $n = 7$ ). (D) WAT histology (sections from 3 individual mice). Scale bar: 100  $\mu$ m. Data are presented as mean  $\pm$  SEM; \* $p < 0.05$ .

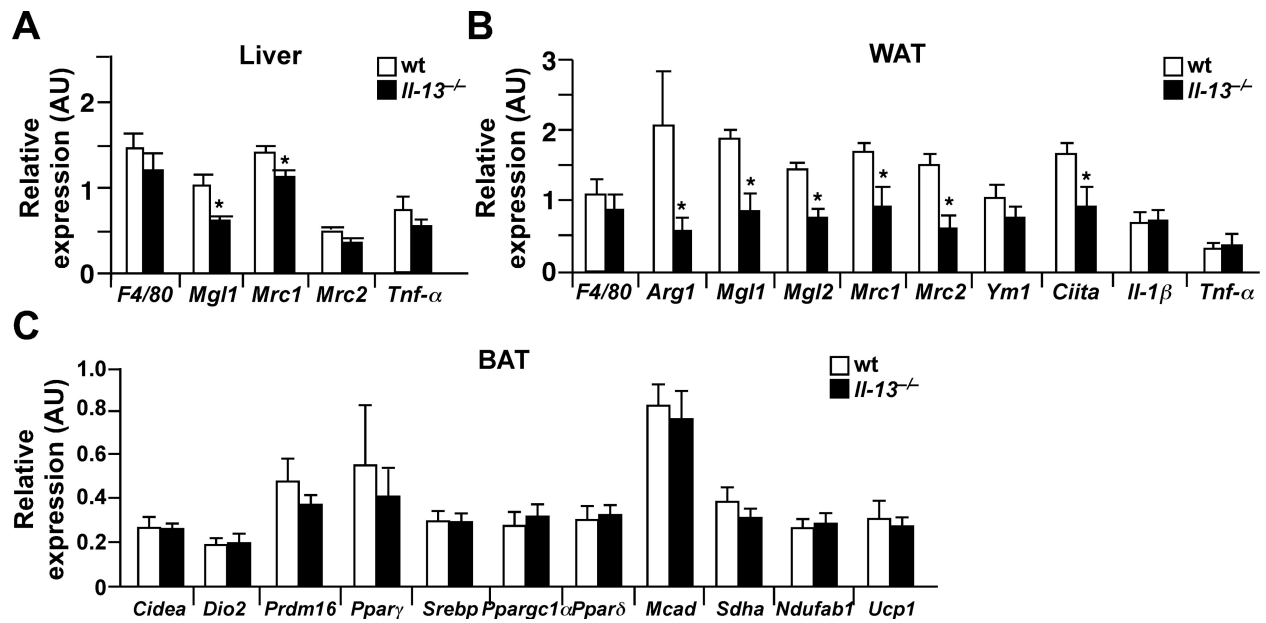

#### Supplemental Figure 4

Inflammatory and metabolic gene expression in BALB/c wt and *Il-13*<sup>-/-</sup> mice on high fat diet. (A) and (B) Gene expression analyses of inflammatory markers in liver and white adipose tissue (WAT). Tissue samples from 6 h fasted wt and *Il-13*<sup>-/-</sup> mice in the BALB/c background ( $n = 6$ , high fat diet for 6 months) were collected and gene expression was analyzed by quantitative, real-time PCR. (C) Expression profiling of oxidative metabolism and thermogenic genes in brown adipose tissue (BAT). Data are presented as mean  $\pm$  SEM; \* $p < 0.05$ .

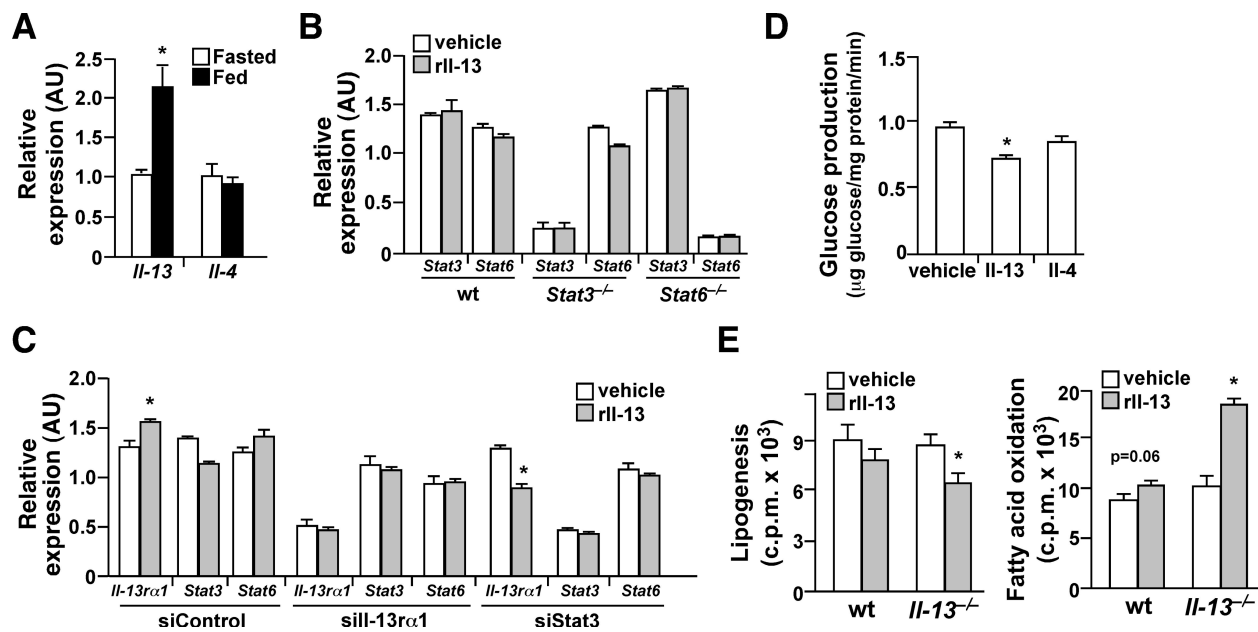

### Supplemental Figure 5

Assessment of knockout/knockdown efficiency and the role of *Il-13* in fat metabolism in hepatocytes. (A) Hepatic expression of *Il-13* and *Il-4* at the fed or fasted state determined by quantitative real-time PCR (male C57BL/6 mice,  $n = 5$ ). (B) The expression of *Stat3* and *Stat6* in wt, *Stat3*<sup>-/-</sup> and *Stat6*<sup>-/-</sup> hepatocytes ± rIl-13 (10 ng/ml) determined by quantitative real-time PCR. (C) The expression of *Stat3*, *Stat6* and *Il-13ra1* in control (sicontrol), *Il-13ra1* siRNA (siIl-13ra1) and *Stat3* siRNA (siStat3) transfected hepatocytes ± rIl-13 (10 ng/ml). (D) *Il-4* does not suppress glucose production. Glucose production assays were conducted in primary hepatocytes ± rIl-13 or rIl-4 (10 ng/ml). (E) Lipogenic and fatty acid β oxidation assays in wt and *Il-13*<sup>-/-</sup> hepatocytes ± rIl-13. Data are presented as mean ± SEM; \* $p < 0.05$ .
